# Supplementary material for: Synthesis of visible and near infrared light sensitive amorphous titania for photocatalytic hydrogen evolution
Source: Royal Society of Chemistry journal article supplement (doi:10.1039/c5gc02170g), 2015-11-13
Supplement: c5gc02170g1.pdf [file c5gc02170g1.pdf]

## Supporting Information

### **Synthesis of Visible and Near Infrared Light Sensitive Amorphous Titania for Photocatalytic Hydrogen Evolution**

Jinghui Jiang, Xingwei Tang, Shujun Zhou, Jian Ding, Han Zhou, Fan Zhang, Di Zhang, Tongxiang Fan\*

State Key Laboratory of Metal Matrix Composites, Shanghai Jiaotong University, Dongchuan Road 800, Shanghai 200240, P. R. China

### 1. The mechanism of preparation of a-TiO<sub>2-x</sub>

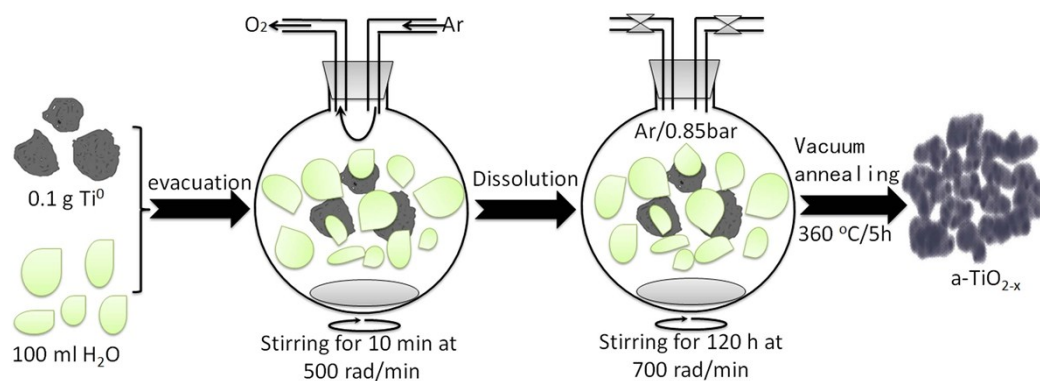

Fig.S1 Schematic illustration of the preparation of a-TiO<sub>2-x</sub>

### 2. XRD analyses for hydrolytic products

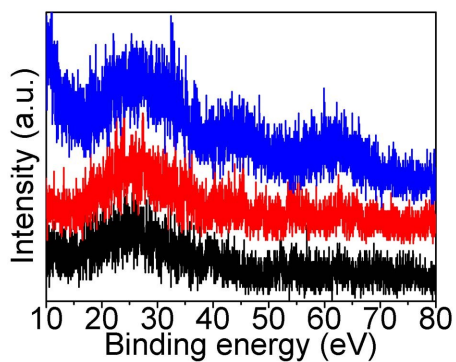

Fig.S2 XRD patterns of hydrolytic products by repeating 120 h of water dissolving Ti<sup>0</sup> for three times in anaerobic environment

### 3. HRTEM analyses for final products

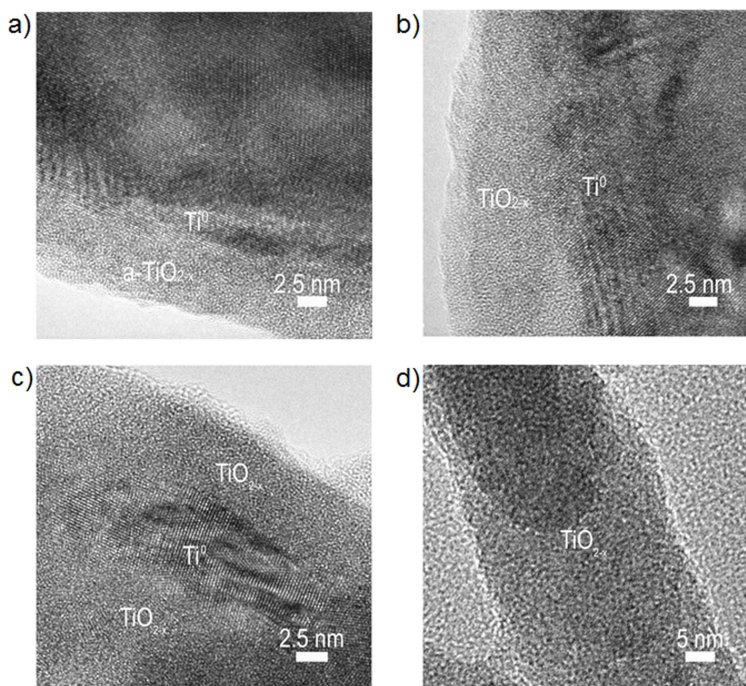

**Fig.S3** (A) to (D) are the HRTEM images of the final products from 15 h, 30 h, 60 h, and 120 h of anaerobic hydrolysis, respectively.

#### 4. XPS and EPR analyses for a-TiO<sub>2-x</sub>

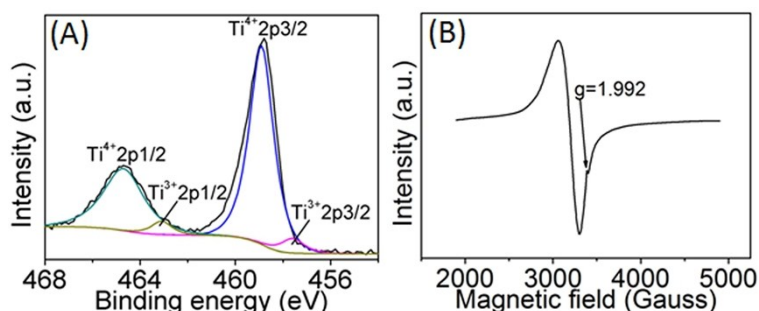

**Fig.S4** (A) and (B) are the Ti2p XPS spectrum and EPR test for a-TiO<sub>2-x</sub> after three months of storage.

#### 5. XRD, XPS, EPR, and UV-vis analyses for c-TiO<sub>2-x</sub>

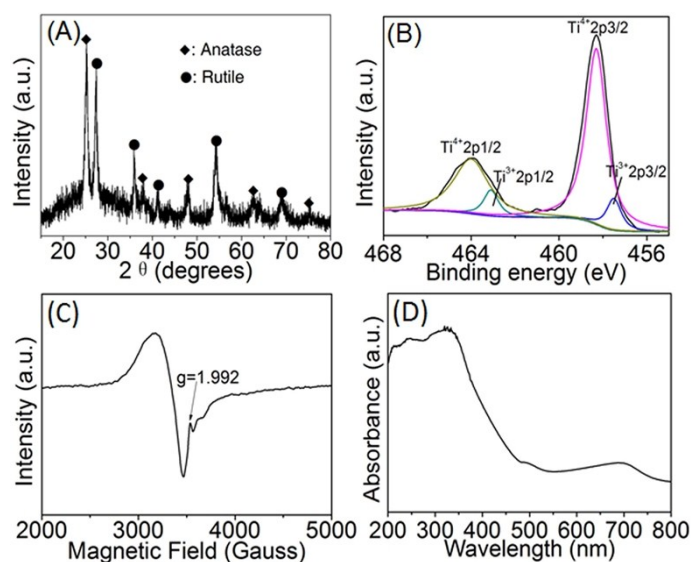

**Fig.S5** (A), (B), (C), and (D) are the XRD pattern, high resolution Ti2p XPS spectrum, EPR test, and UV-vis absorption spectrum for c-TiO<sub>2-x</sub>, respectively.

#### 6. Calculation of the bandgap

For a semiconductor, the optical absorption near the band edge follows the equation,<sup>1</sup>

$$\alpha = A(h\nu - E_g)^{n/2} / h\nu \quad (1)$$

where  $\alpha$ ,  $\nu$ ,  $E_g$ ,  $A$ , and  $n$  are the absorption coefficient, incident light frequency, bandgap, constant, and an integer, respectively.  $n$  depends on whether the transition is direct ( $n=1$ ) or indirect ( $n=4$ ). We use  $n=4$  to calculate the mobility gap of as-synthesized a-TiO<sub>2-x</sub> by transforming equation (1) into the following equation:  $(\alpha h\nu / A)^{1/2} = h\nu - E_g$

|           | A(X)       | C(Y)       | B(Y)           | D(Y)                             |
|-----------|------------|------------|----------------|----------------------------------|
| Long Name |            |            |                |                                  |
| Units     |            |            |                |                                  |
| Comments  | Wavelength | Absorbance | 1024/Col(A)=hv | $((Col(B)*Col(C))^2=(Ahv)^{1/2}$ |
| 1         | 1100       | 0.93107    | 5.12           | 2.47094                          |
| 2         | 1099       | 0.93011    | 5.09453        | 2.47119                          |
| 3         | 1098       | 0.92897    | 5.06931        | 2.47948                          |
| 4         | 1097       | 0.92889    | 5.04433        | 2.48263                          |
| 5         | 1096       | 0.92777    | 5.01961        | 2.48469                          |
| 6         | 1095       | 0.92836    | 4.99512        | 2.4785                           |
| 7         | 1094       | 0.92946    | 4.97087        | 2.47915                          |

**Fig. S6** Calculation of the mobility gap for a-TiO<sub>2-x</sub> based on the data shown in Fig. 6A

|           | A(X)       | B(Y)       | C(Y)           | D(Y)                             |
|-----------|------------|------------|----------------|----------------------------------|
| Long Name |            |            |                |                                  |
| Units     |            |            |                |                                  |
| Comments  | Wavelength | Absorbance | 1024/Col(A)=hv | $((Col(B)*Col(C))^2=(Ahv)^{1/2}$ |
| 1         | 200        | 1.21666    | 6.2            | 2.74651                          |
| 2         | 201        | 1.21371    | 6.16915        | 2.73634                          |
| 3         | 202        | 1.22363    | 6.13861        | 2.74069                          |
| 4         | 203        | 1.2394     | 6.10837        | 2.75149                          |
| 5         | 204        | 1.2456     | 6.07843        | 2.7516                           |
| 6         | 205        | 1.25526    | 6.04878        | 2.7555                           |
| 7         | 206        | 1.2659     | 6.01942        | 2.76044                          |

**Fig. S7** The calculation of the bandgap for c-TiO<sub>2-x</sub> based on the data shown in Fig.S5 D

## 7. Calculation of the quantum yield

The quantum yield was measured and calculated by the reported method.<sup>2</sup> Irradiation was performed at room temperature by using a 750 W Xe arc lamp as the light source. The 488 nm single wavelength filter was used throughout the photocatalytic hydrogen evolution and the irradiation of iron (III) potassium oxalate trihydrate (IPTO) to get rid of the other wavelengths of incident light except 488 nm. The detailed measurement of the absorbance for IPTO at 510 nm wavelength is listed as follows:

Firstly, 25 ml 0.08 mol/l IPTO was irradiated by the incident light with 488 nm wavelength for 60 s, and then 1 ml of the irradiated IPTO was fetched and added into the stabilizing agent (containing 20 ml water, 4 ml 0.1% 1,10-Phenanthroline monohydrate, and 1 ml 7.6% sodium oxalate solution) under dark. Similarly, another two irradiated IPTO samples were prepared by repeating the above operations for two times.

Secondly, the unirradiated IPTO samples were prepared by adding 1ml 0.08 mol/l unirradiated IPTO into the stabilizing agent (containing 20 ml water, 4 ml 0.1% 1, 10-Phenanthroline monohydrate, and 1 ml 7.6% sodium oxalate solution) under dark. Similarly, another two unirradiated IPTO samples were prepared by repeating the above operations for two times.

Finally, the above irradiated and unirradiated IPTO samples were utilized as the samples to test their absorbances at 510 nm wavelength.

**Table S1.** The absorbances ( $\Delta A$ ) at 510 nm wavelength for three IPTO samples via 488 nm light irradiation for 60 s and three IPTO samples without light irradiation

| Experiments | $\Delta A1$ | $\Delta A2$ | $\Delta A3$ | Average ( $\Delta \bar{A}$ ) |
|-------------|-------------|-------------|-------------|------------------------------|
| Irradiation | 0.1007      | 0.1023      | 0.0966      | 0.0999                       |
| Without     | 0.0754      | 0.0825      | 0.0805      | 0.0795                       |

irradiation

**Table S2.** The photocatalytic H<sub>2</sub> evolution of a-TiO<sub>2-x</sub> and c-TiO<sub>2-x</sub> irradiated by 488 nm incident light for 5 h and the calculated quantum yield

| Experiment           | Total H <sub>2</sub> produced (μmol) | H <sub>2</sub> produced (μmol h <sup>-1</sup> ) | Quantum yield [%] |
|----------------------|--------------------------------------|-------------------------------------------------|-------------------|
| a-TiO <sub>2-x</sub> | 0.9104                               | 0.182                                           | 4.57              |
| c-TiO <sub>2-x</sub> | 0.0315                               | 0.006                                           | 0.16              |

## 8. EPR analysis for a-TiO<sub>2</sub> from tetrabutyl titanate

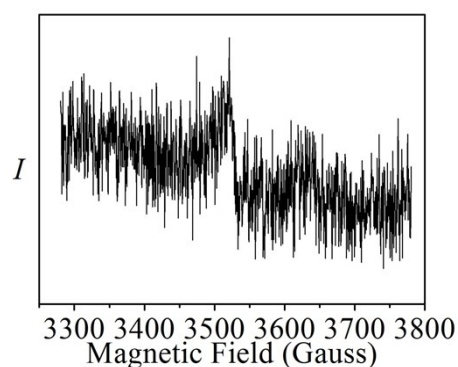

**Fig.S8** EPR (X-band) spectrum at 100 K in air for a-TiO<sub>2</sub> from hydrothermal decomposition of tetrabutyl titanate according to the reported method [3]

## 9. HRTEM analyses for final products

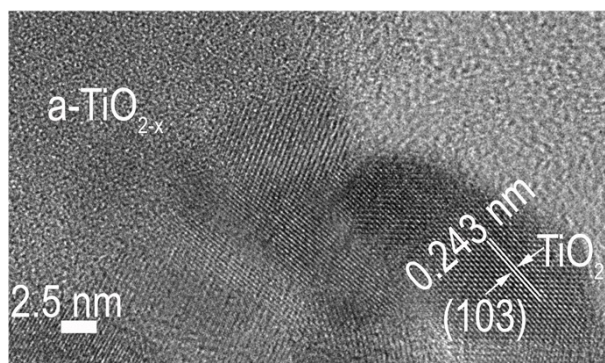

**Fig.S9** HRTEM analyses for final product by vacuum annealing the hydrolytic products at 400 °C for 5 h.

## Reference

- [1] M. A. Butler, J. Appl. Phys, 1977, **48**, 1914.
- [2] H. J. Kuhn, S.E. Braslavsky and R. Schmidt, Pure. Appl. Chem, 2004, **76**, 2105.
- [3] S. Y. Guo, S. Han, H.F. Mao, S. M. Dong, C. C. Wu and L. C. Jia, J. Power. Sources, 2014, **245**, 979.
